## CORRECTION

# Correction: Estimating measurement error in child language assessments administered by daycare educators in large scale intervention studies

The *PLOS ONE* Staff

In the Author Contributions, Anders Højen and Dorthe Bleses should also be listed as people who wrote (review & editing) the paper. The correct contributions are:

**Writing—review & editing:** E. F. Haghish, Werner Vach, Anders Højen, Dorthe Bleses.  
The publisher apologizes for the error.

## Reference

1. Haghish EF, Vach W, Højen A, Bleses D (2021) Estimating measurement error in child language assessments administered by daycare educators in large scale intervention studies. *PLOS ONE* 16 (11): e0255414. <https://doi.org/10.1371/journal.pone.0255414> PMID: 34797825

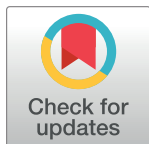

## OPEN ACCESS

**Citation:** The *PLOS ONE* Staff (2024) Correction: Estimating measurement error in child language assessments administered by daycare educators in large scale intervention studies. *PLoS ONE* 19(5): e0304884. <https://doi.org/10.1371/journal.pone.0304884>

**Published:** May 31, 2024

**Copyright:** © 2024 The PLOS ONE Staff. This is an open access article distributed under the terms of the [Creative Commons Attribution License](https://creativecommons.org/licenses/by/4.0/), which permits unrestricted use, distribution, and reproduction in any medium, provided the original author and source are credited.
